# Supplementary material for: A radioligand binding assay for the insulin-like growth factor 2 receptor
Source: PubMed Central journal article supplement (PMC7467306; doi:10.1371/journal.pone.0238393), 2020-09-02
Supplement: pone.0238393.s001.pdf [file pone.0238393.s001.pdf]

# Supporting Information

**S1 Fig.** RP-HPLC chromatogram of the purified D11 protein.

**S2 Fig.** MALDI mass spectrum of purified D11 protein.

**S3 Fig.** RP-HPLC separation of crude products after radiolabeling of human IGF2 with [<sup>125</sup>I].

**S4 Fig.** RP-HPLC analysis of isolated [<sup>125</sup>I]-monoiodotyrosyl-Tyr2-IGF2.

**S5 Fig.** Representative binding curves of the hormones for insulin and IGF-1 receptors in membranes of intact cells.

**S6 Fig.** Relative abilities of human insulin, IGF1, IGF2, and Leu19-IGF2 to stimulate phosphorylation of receptors.

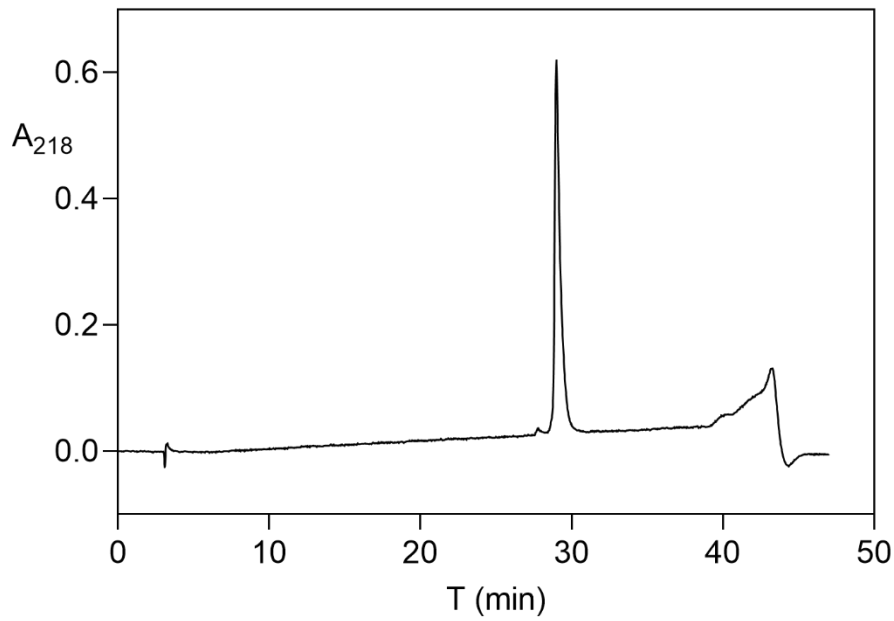

**S1 Fig.** RP-HPLC chromatogram of the purified D11 protein. Analysis was done on Vydac C4 column 0.4 x 25 cm in a gradient of acetonitrile in water with 0.1 % TFA.

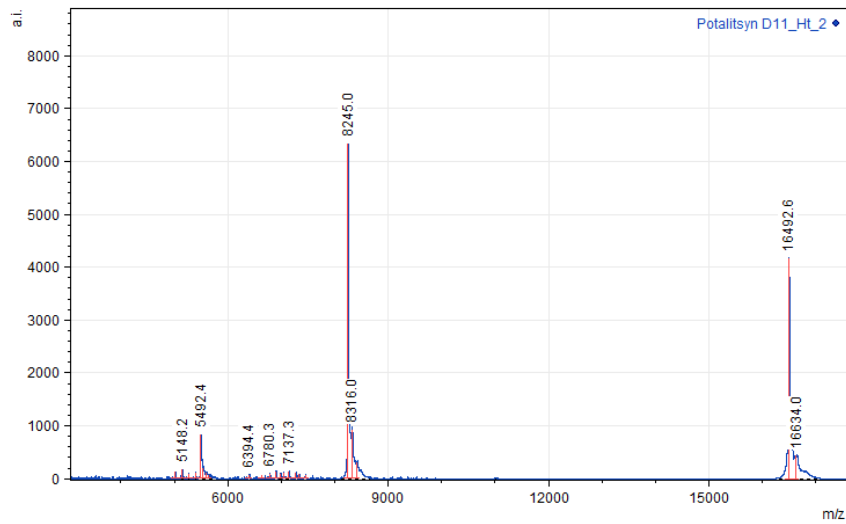

**S2 Fig.** MALDI mass spectrum of purified D11 protein. Expected average mass is 16491.6. The signal 8245.0 is a double charged molecule and the signal 16492.6 belongs to a single charged molecule.

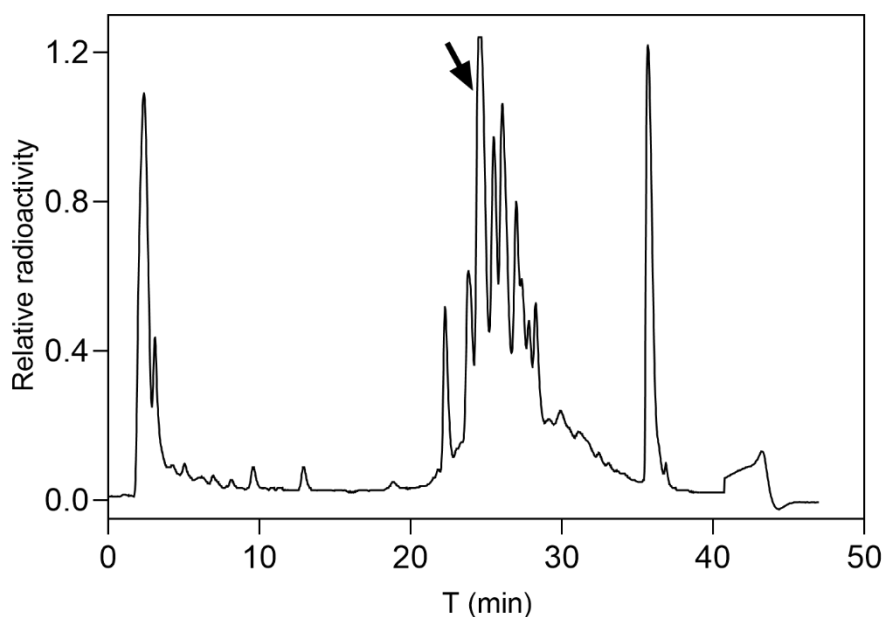

**S3 Fig.** RP-HPLC separation of crude products after radiolabeling of human IGF2 with [ $^{125}$ I]. The isolated peak containing [ $^{125}$ I]-moniodotyrosyl-Tyr2-IGF2 is marked with an arrow. HPLC set up: BioZen C4 column ( $5\mu$ ,  $125 \times 4.6$  mm), 1 mL/min. Solvent A = H<sub>2</sub>O, TFA (0.1 %), solvent B = AcCN, TFA (0.1 %), gradient: 20 % B for 0 min., 54 % B in 80 min (linear).

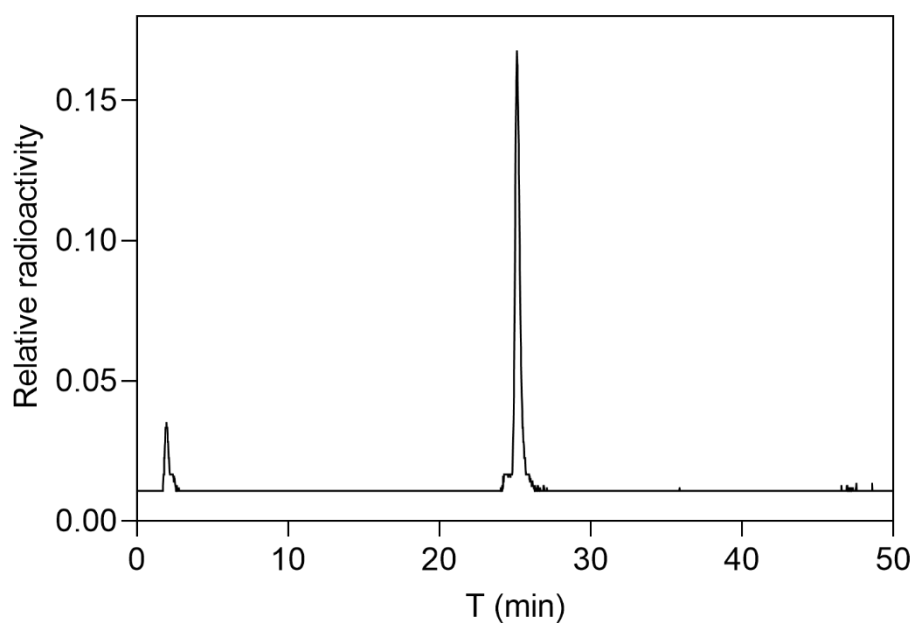

**S4 Fig.** RP-HPLC analysis of isolated [ $^{125}$ I]-moniodotyrosyl-Tyr2-IGF2. HPLC set up was the same as in Figure S3.

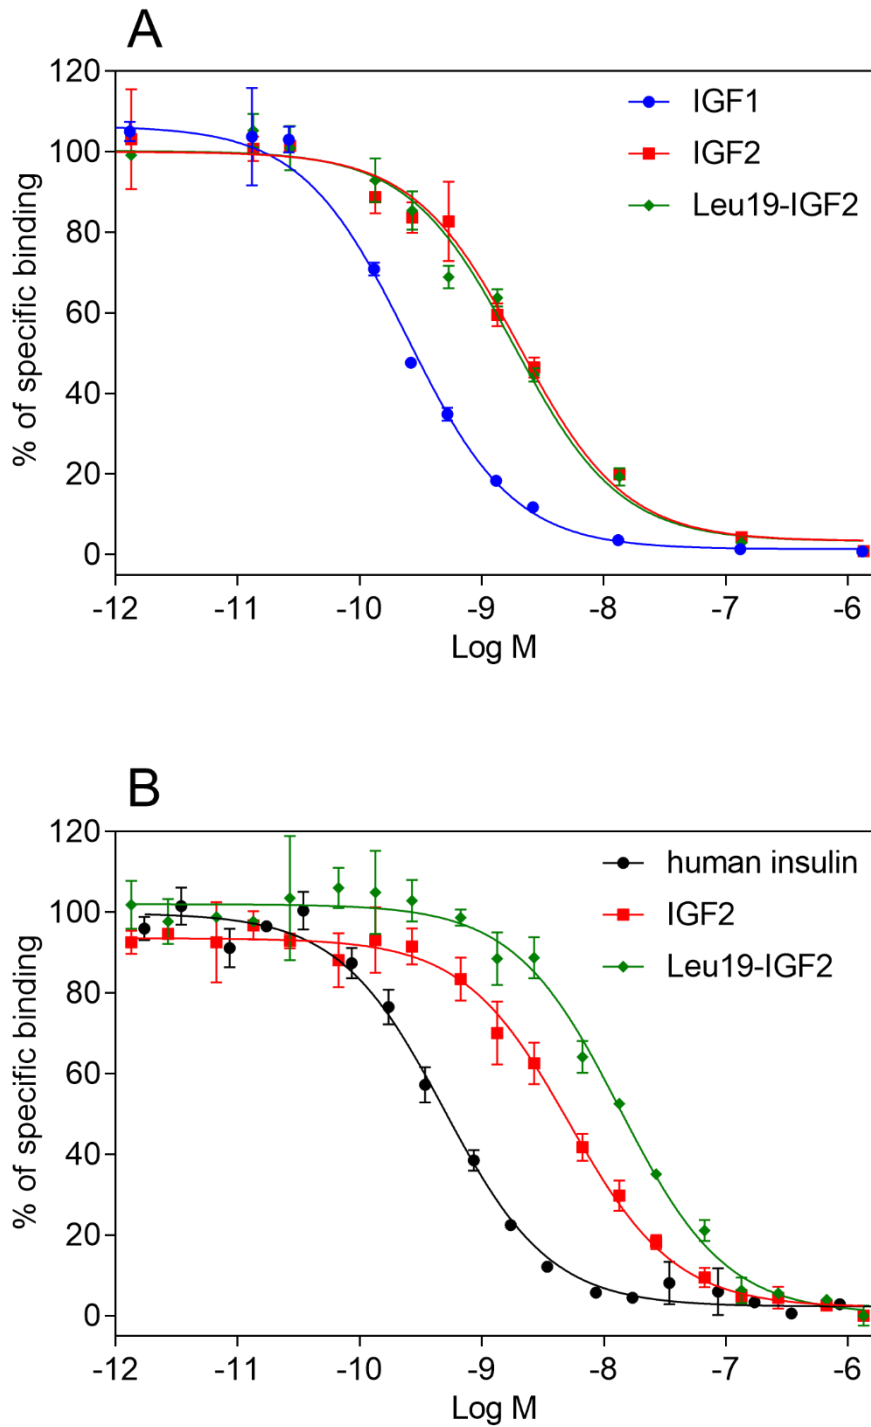

**S5 Fig.** Representative binding curves of the hormones for insulin and IGF-1 receptors in membranes of intact cells. **(A)** Inhibition of binding of human  $[^{125}\text{I}]\text{-IGF1}$  to IGF1R in membranes of mouse fibroblasts by IGF1 (in blue), human IGF2 (in red), and Leu19-IGF2 (in green). **(B)** Inhibition of binding of  $[^{125}\text{I}]\text{-monoiodotyrosyl-TyrA14-human insulin}$  to IR-A in human IM-9 lymphocytes by human insulin ( $\bullet$ ), human IGF2 ( $\blacksquare$ ), and Leu19-IGF2 analog ( $\blacklozenge$ ).

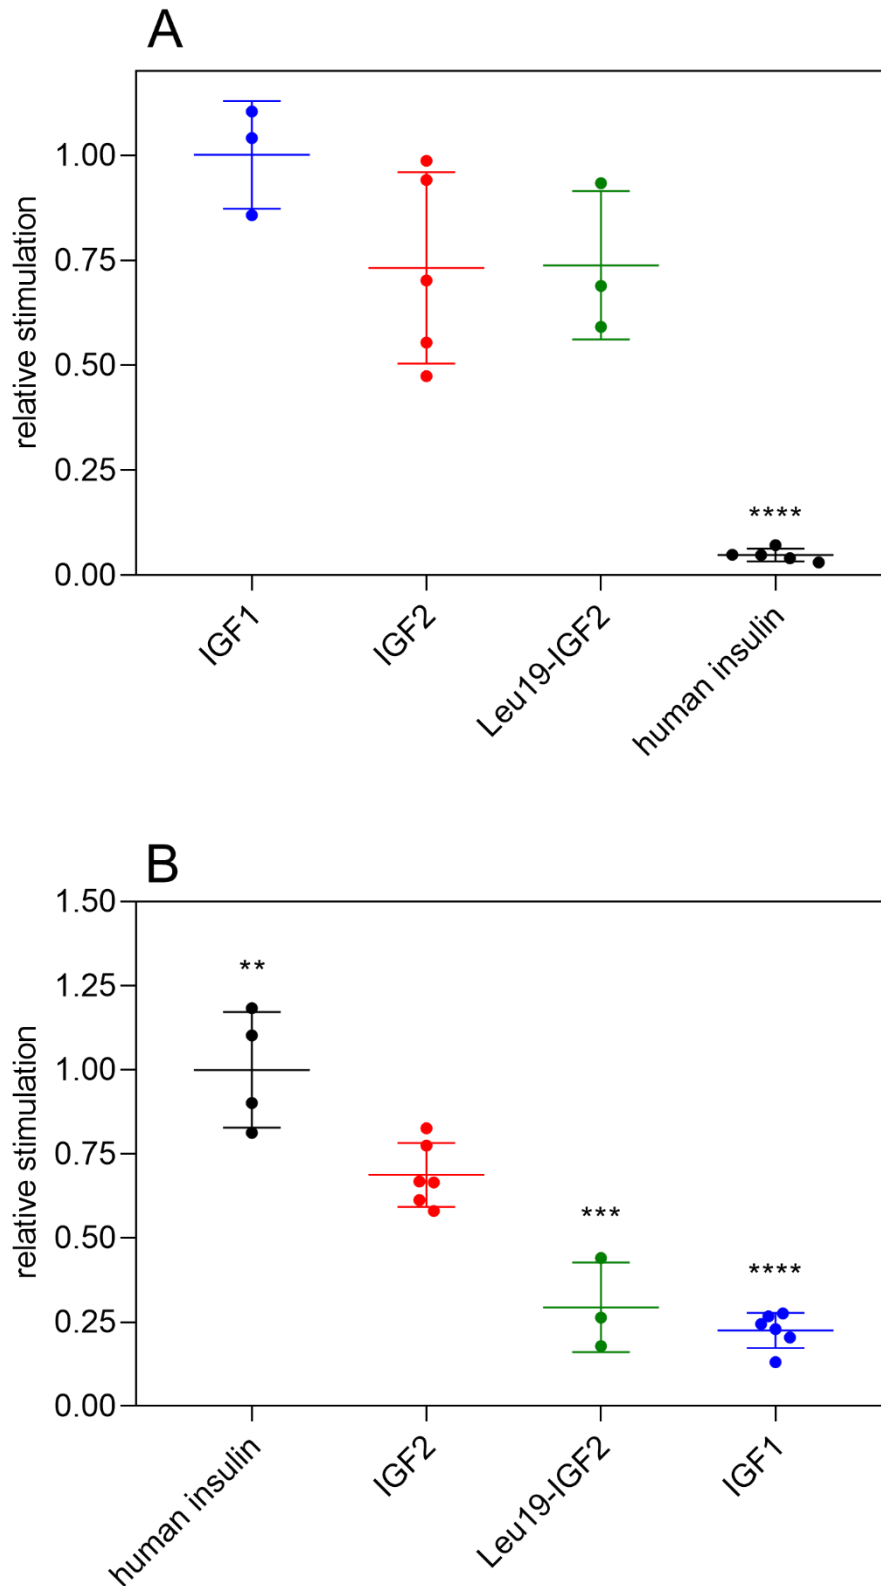

**S6 Fig.** Relative abilities of human insulin, IGF1, IGF2, and Leu19-IGF2 to stimulate phosphorylation of receptors. IGF1R-transfected cells (**A**) or IR-A-transfected cells (**B**) were stimulated with 10 nM ligands for 10 min. Asterisks indicate that phosphorylation of the

receptor induced by a ligand differs significantly from that of insulin (\*,  $p < 0.05$ ; \*\*,  $p < 0.01$ ; \*\*\*,  $p < 0.001$ , \*\*\*\*,  $p < 0.0001$ ).
